# Supplementary material
Source: Springer Nature journal article supplement (https://www.springermedizin.de/resource/supplementary/12882_2011_363_MOESM7_ESM.pdf/9453698)

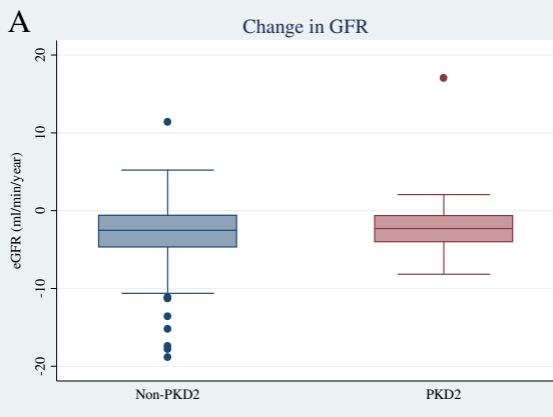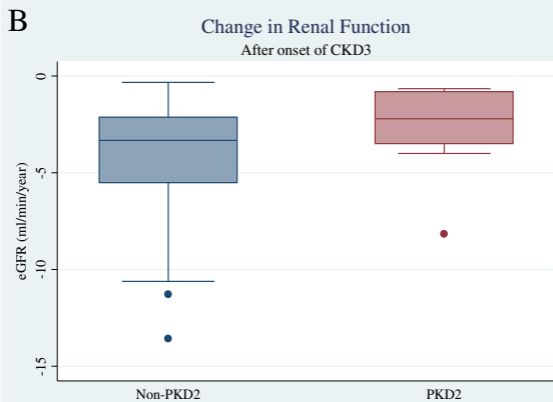

Supplement: MOESM7 [file 9453698]
